# Supplementary material for: No Fabry Disease in Patients Presenting with Isolated Small Fiber Neuropathy
Source: PLoS One. 2016 Feb 11;11(2):e0148316. doi: 10.1371/journal.pone.0148316 (PMC4750945; doi:10.1371/journal.pone.0148316)
Supplement: S1 Dataset — (XLSX) [file pone.0148316.s001.xlsx]

## Sheet: Recovered_Sheet1
Studylabel	Gender (0=female, 1=male)	Diabetes Mellitus	DMtype	Immology	Hypothyrodism	Age at Visit	Debut of complaints	Duration of complaints	Erythromelalgia	Galactosidase	Galactosidase2 (0=normal, 1=abnormal)	LysoGB3 (0=normal, 1=abnormal, 9=unknown)	GLA (0=normal, 1=abnormal, 2=not performed)	mutationGLA	proteinGLA	polymorfismGLA	pmproteinGLA	GLAclass
125	1	0	0	0	0	46	#NULL!	#NULL!	0	148.9	0	9	2	0	0	0	0	0
34	1	0	0	0	0	32	#NULL!	#NULL!	0	77	0	9	2	0	0	0	0	0
255	0	0	0	Sjogren	0	56	52	4	0	64.6	0	0	0	0	0	0	0	0
422	0	0	0	Sjogren	0	70	50	20	0	50	0	0	0	0	0	0	0	0
1216	0	0	0	Sjogren	0	52	32	20	0	46	0	0	0	0	0	0	0	0
1194	0	0	0	Sjogren	0	39	39	1	0	43.9	0	0	0	0	0	0	0	0
1005	0	0	0	Sjogren	0	37	36	1	0	50.9	0	0	0	0	0	0	0	0
1106	1	0	0	Sjogren	0	43	41	2	0	98.5	0	0	2	0	0	9	0	0
1198	0	1	2	Sarcoido	0	58	55	3	0	31.1	0	0	0	0	0	0	0	0
382	1	0	0	Sarcoido	0	65	34	31	0	126	0	9	0	0	0	0	0	0
194	0	0	0	Sarcoido	0	51	49	2	0	88.8	0	9	0	0	0	0	0	0
171	0	0	0	Sarcoido	0	49	48	1	0	80.5	0	9	0	0	0	0	0	0
182	0	0	0	Sarcoido	0	50	49	1	0	49.5	0	0	0	0	0	0	0	0
155	0	0	0	Sarcoido	0	48	48	1	0	74.4	0	9	0	0	0	0	0	0
172	0	0	0	Sarcoido	0	49	31	18	0	66.7	0	0	0	0	0	0	0	0
1099	0	0	0	Sarcoido	0	45	41	4	0	73.8	0	0	0	0	0	0	0	0
1155	0	0	0	Sarcoido	0	40	38	2	0	123.7	0	9	0	0	0	0	0	0
45	0	0	0	Sarcoido	0	35	33	2	0	81.4	0	0	0	0	0	0	0	0
98	1	0	0	Sarcoido	0	43	43	1	0	44.4	0	0	2	0	0	0	0	0
1022	1	0	0	Sarcoido	0	37	33	4	0	84.7	0	0	2	0	0	9	0	0
1192	1	1	1	Sarcoido	0	59	57	2	0	123.5	0	0	2	0	0	9	0	0
263	1	0	0	Sarcoido	0	56	48	8	0	61.5	0	9	2	0	0	0	0	0
221	1	0	0	Sarcoido	0	53	51	2	0	43.2	0	9	2	0	0	0	0	0
188	1	0	0	Sarcoido	0	50	49	1	0	115.5	0	9	2	0	0	0	0	0
1075	1	0	0	Sarcoido	0	44	44	1	0	51.3	0	0	2	0	0	9	0	0
46	1	0	0	Sarcoido	0	36	34	2	0	73.7	0	0	2	0	0	0	0	0
1058	1	0	0	Sarcoido	0	36	29	7	0	69.4	0	0	2	0	0	9	0	0
1039	0	0	0	MGUS	0	51	49	1	0	63.2	0	0	0	0	0	0	0	0
1262	0	0	0	MGUS	0	72	70	2	0	69.5	0	0	0	0	0	0	0	0
331	1	0	0	MGUS	0	61	59	2	0	90.2	0	0	2	0	0	0	0	0
372	1	0	0	MGUS	0	64	60	4	0	39.6	0	9	2	0	0	0	0	0
1265	0	0	0	0	2	29	18	11	0	61.4	0	0	0	0	0	0	0	0
1092	1	0	0	0	2	74	72	2	0	78.3	0	0	2	0	0	9	0	0
1157	1	0	0	0	2	59	49	10	0	95.2	0	0	2	0	0	9	0	0
1171	0	0	0	0	0	56	47	9	0	107.4	0	0	0	0	0	0	0	0
80	0	0	0	0	0	41	40	1	0	66.6	0	0	0	0	0	0	0	0
223	0	0	0	0	0	53	52	1	0	38.8	0	0	0	0	0	0	0	0
265	0	0	0	0	0	56	54	2	0	41.7	0	0	0	0	0	0	0	0
230	0	0	0	0	0	54	31	23	0	54.1	0	0	0	0	0	0	0	0
165	0	0	0	0	0	49	42	7	0	54.7	0	0	0	0	0	0	0	0
344	0	0	0	0	0	63	60	3	0	71.9	0	0	0	0	0	0	0	0
205	0	0	0	0	0	52	52	1	0	98.6	0	0	0	0	0	0	0	0
1100	0	0	0	0	0	79	79	1	0	64.3	0	0	0	0	0	0	0	0
1181	0	0	0	0	0	77	70	7	0	78.4	0	0	0	0	0	0	0	0
1026	0	0	0	0	0	69	64	5	0	71.3	0	0	0	0	0	0	0	0
376	0	0	0	0	0	65	62	3	0	999	0	9	0	0	0	0	0	0
360	0	0	0	0	0	64	54	10	0	71.5	0	0	0	0	0	0	0	0
343	0	0	0	0	0	62	58	4	0	74.7	0	0	0	0	0	0	0	0
1144	0	0	0	0	0	62	59	3	0	66.1	0	0	0	0	0	0	0	0
301	0	0	0	0	0	59	52	7	0	69.2	0	0	0	0	0	0	0	0
1049	0	0	0	0	0	59	55	4	0	66.6	0	0	0	0	0	0	0	0
270	0	0	0	0	0	56	53	3	0	75.9	0	9	0	0	0	0	0	0
264	0	0	0	0	0	56	54	2	0	68.4	0	0	0	0	0	0	0	0
240	0	0	0	0	0	55	53	2	0	56.1	0	0	0	0	0	0	0	0
1164	0	0	0	0	0	55	52	3	0	105.4	0	0	0	0	0	0	0	0
236	0	0	0	0	0	54	52	2	0	51.6	0	0	0	0	0	0	0	0
1038	0	0	0	0	0	54	54	1	0	122.4	0	0	0	0	0	0	0	0
1273	0	0	0	0	0	53	43	10	0	14	1	0	0	0	0	0	0	0
213	0	0	0	0	0	52	49	3	0	61	0	0	0	0	0	0	0	0
203	0	0	0	0	0	52	51	1	0	36.4	0	0	0	0	0	0	0	0
1130	0	0	0	0	0	52	32	20	0	68.9	0	0	0	0	0	0	0	0
1089	0	0	0	0	0	52	45	7	0	44.1	0	0	0	0	0	0	0	0
1271	0	0	0	0	0	45	33	12	0	49.7	0	0	0	0	0	0	0	0
66	0	0	0	0	0	39	37	2	0	33.1	0	9	0	0	0	0	0	0
62	0	0	0	0	0	38	35	3	0	44.3	0	0	0	0	0	0	0	0
1235	0	0	0	0	0	38	36	2	0	72.9	0	0	0	0	0	0	0	0
39	0	0	0	0	0	33	31	2	0	59.7	0	0	0	0	0	0	0	0
1219	1	0	0	0	0	75	70	5	0	106.6	0	0	2	0	0	9	0	0
1054	1	1	2	0	0	58	56	2	0	47	0	0	2	0	0	9	0	0
1112	1	0	0	0	0	79	77	2	0	51.4	0	0	2	0	0	9	0	0
432	1	0	0	0	0	72	70	2	0	56.5	0	0	2	0	0	0	0	0
1264	1	0	0	0	0	67	57	10	0	56.4	0	0	2	0	0	9	0	0
284	1	0	0	0	0	57	5	52	0	79	0	9	2	0	0	0	0	0
297	1	0	0	0	0	58	33	25	0	42.8	0	9	2	0	0	0	0	0
1236	1	0	0	0	0	55	47	8	0	82.9	0	0	2	0	0	9	0	0
1229	1	0	0	0	0	45	39	6	0	64.2	0	0	2	0	0	9	0	0
444	1	0	0	0	0	74	74	1	0	48.7	0	0	2	0	0	0	0	0
386	1	0	0	0	0	65	55	10	0	163.1	0	9	2	0	0	0	0	0
138	0	0	0	0	0	47	45	2	0	999	0	9	0	0	0	0	0	0
1131	1	0	0	0	0	39	37	2	0	71.6	0	0	2	0	0	9	0	0
1069	0	0	0	0	0	64	64	1	0	103.1	0	0	0	0	0	0	0	0
1246	0	0	0	0	0	55	53	2	0	48.5	0	0	0	0	0	0	0	0
1027	1	0	0	0	0	58	54	4	0	73.7	0	0	2	0	0	9	0	0
1019	0	0	0	0	0	37	32	5	0	43.3	0	0	0	0	0	0	0	0
342	0	0	0	0	0	62	57	5	0	95.1	0	0	0	0	0	0	0	0
399	1	0	0	0	0	67	64	3	0	44	0	0	0	0	0	0	0	0
1184	0	0	0	0	0	35	33	2	0	118.6	0	0	0	0	0	0	0	0
110	1	0	0	0	0	44	43	2	0	50.7	0	0	2	0	0	0	0	0
409	1	0	0	0	0	68	64	4	0	42	0	9	2	0	0	0	0	0
381	1	0	0	0	0	65	35	30	0	122.9	0	9	2	0	0	0	0	0
1270	0	0	0	0	0	40	30	10	0	76.8	0	0	0	0	0	0	0	0
330	0	0	0	0	0	61	52	9	0	73.3	0	0	0	0	0	0	0	0
318	0	0	0	0	0	60	59	1	0	72.8	0	0	0	0	0	0	0	0
303	0	0	0	0	0	59	56	3	0	61.7	0	0	0	0	0	0	0	0
271	0	0	0	0	0	56	49	7	0	65.6	0	0	0	0	0	0	0	0
247	0	0	0	0	0	55	51	4	0	58.6	0	0	0	0	0	0	0	0
252	1	0	0	0	0	55	53	2	0	58.9	0	0	0	0	0	0	0	0
181	0	0	0	0	0	50	48	2	0	68.3	0	0	0	0	0	0	0	0
169	0	0	0	0	0	49	42	5	0	80.8	0	9	0	0	0	0	0	0
149	0	0	0	0	0	48	44	4	0	59.8	0	0	0	0	0	0	0	0
76	0	0	0	0	0	40	38	1	0	52.1	0	9	0	0	0	0	0	0
49	0	0	0	0	0	37	26	11	0	48.9	0	0	0	0	0	0	0	0
9	0	0	0	0	0	20	17	3	0	42.2	0	0	0	0	0	0	0	0
103	0	0	0	0	0	43	40	3	0	56.1	0	9	0	0	0	0	0	0
355	0	0	0	0	0	63	53	10	0	75.9	0	0	0	0	0	0	0	0
411	0	0	0	0	0	69	67	2	0	93.8	0	0	0	0	0	0	0	0
120	0	0	0	0	0	45	43	2	0	79.1	0	9	0	0	0	0	0	0
1078	1	0	0	0	0	45	42	3	0	61.6	0	0	0	0	0	0	0	0
1072	0	0	0	0	0	37	35	2	0	58.9	0	0	0	0	0	0	0	0
216	0	0	0	0	0	53	38	15	0	71.8	0	9	0	0	0	0	0	0
154	0	0	0	0	0	48	45	3	0	77.4	0	9	0	0	0	0	0	0
168	0	0	0	0	0	49	21	28	0	53.4	0	0	0	0	0	0	0	0
153	0	0	0	0	0	48	45	3	0	54.9	0	0	0	0	0	0	0	0
1093	0	0	0	0	0	41	28	13	0	69	0	0	0	0	0	0	0	0
1115	0	0	0	0	0	38	38	1	0	48.1	0	0	0	0	0	0	0	0
319	1	0	0	0	0	60	56	4	0	69.5	0	0	0	0	0	0	0	0
292	0	0	0	0	0	58	53	5	0	72.8	0	0	0	0	0	0	0	0
447	0	1	2	0	0	75	70	5	0	68.2	0	0	0	0	0	0	0	0
1041	0	1	1	0	0	75	72	3	0	46.2	0	0	0	0	0	0	0	0
415	0	1	2	0	0	69	69	1	0	74.4	0	0	0	0	0	0	0	0
378	0	1	2	0	0	65	55	10	0	61	0	0	0	0	0	0	0	0
1104	0	1	2	0	0	60	30	30	0	60.7	0	0	0	0	0	0	0	0
283	0	1	2	0	0	57	44	13	0	46.9	0	9	0	0	0	0	0	0
260	0	1	2	0	0	56	44	12	0	75	0	9	0	0	0	0	0	0
461	0	0	0	0	0	85	79	6	0	42.1	0	0	0	0	0	0	0	0
459	0	0	0	0	0	80	60	20	0	67.5	0	9	0	0	0	0	0	0
448	0	0	0	0	0	76	67	9	0	115.6	0	9	0	0	0	0	0	0
453	0	0	0	0	0	76	66	10	0	50	0	9	0	0	0	0	0	0
457	0	0	0	0	0	77	69	8	0	62.4	0	9	0	0	0	0	0	0
455	0	0	0	0	0	77	57	20	0	95.9	0	0	0	0	0	0	0	0
456	0	0	0	0	0	77	72	5	0	70.7	0	0	0	0	0	0	0	0
454	0	0	0	0	0	76	74	2	0	68.2	0	0	0	0	0	0	0	0
440	0	0	0	0	0	73	55	18	0	15.4	1	9	0	0	0	0	0	0
434	0	0	0	0	0	72	67	5	0	40.4	0	9	0	0	0	0	0	0
1029	0	0	0	0	0	75	74	1	0	86.2	0	0	0	0	0	0	0	0
438	0	0	0	0	0	73	68	5	0	54.7	0	0	0	0	0	0	0	0
1142	0	0	0	0	0	74	60	14	0	55.9	0	0	0	0	0	0	0	0
1150	0	0	0	0	0	74	70	4	0	117.2	0	0	0	0	0	0	0	0
419	0	0	0	0	0	70	70	1	0	89.4	0	9	0	0	0	0	0	0
414	0	0	0	0	0	69	63	6	0	999	0	9	0	0	0	0	0	0
435	0	0	0	0	0	72	69	3	0	60.7	0	0	0	0	0	0	0	0
412	1	0	0	0	0	69	68	1	0	46.4	0	9	0	0	0	0	0	0
1035	0	0	0	0	0	73	72	1	0	71.6	0	0	0	0	0	0	0	0
428	0	0	0	0	0	71	69	2	0	83	0	0	0	0	0	0	0	0
416	0	0	0	0	0	69	63	6	0	44.2	0	9	0	0	0	0	0	0
429	0	0	0	0	0	71	66	5	0	83.7	0	0	0	0	0	0	0	0
1268	0	0	0	0	0	72	71	1	0	73	0	0	0	0	0	0	0	0
424	0	0	0	0	0	70	65	5	0	45.3	0	0	0	0	0	0	0	0
425	0	0	0	0	0	70	68	2	0	57.4	0	0	0	0	0	0	0	0
408	0	0	0	0	0	68	67	1	0	68.3	0	9	0	0	0	0	0	0
417	0	0	0	0	0	69	68	1	0	58.9	0	0	0	0	0	0	0	0
395	0	0	0	0	0	66	64	2	0	39.9	0	9	0	0	0	0	0	0
397	0	0	0	0	0	67	65	2	0	61.6	0	9	0	0	0	0	0	0
379	0	0	0	0	0	65	63	2	0	116.3	0	9	0	0	0	0	0	0
370	0	0	0	0	0	64	48	16	0	46.2	0	9	0	0	0	0	0	0
1258	0	0	0	0	0	68	58	10	0	48.8	0	0	0	0	0	0	0	0
368	0	0	0	0	0	64	54	10	0	67.7	0	9	0	0	0	0	0	0
1158	0	0	0	0	0	58	54	4	0	95.8	0	0	0	0	0	0	0	0
1156	0	0	0	0	0	67	25	42	0	107.8	0	0	0	0	0	0	0	0
1228	0	0	0	0	0	68	66	2	0	96	0	0	0	0	0	0	0	0
393	0	0	0	0	0	66	65	1	0	65	0	0	0	0	0	0	0	0
1064	0	0	0	0	0	67	54	13	0	63.3	0	0	0	0	0	0	0	0
366	0	0	0	0	0	64	63	1	0	77.2	0	9	0	0	0	0	0	0
1082	0	0	0	0	0	66	65	1	0	85.8	0	0	0	0	0	0	0	0
361	0	0	0	0	0	64	60	4	0	82.5	0	9	0	0	0	0	0	0
326	0	0	0	0	0	61	60	1	0	55.2	0	9	0	0	0	0	0	0
380	0	0	0	0	0	65	45	20	0	46.7	0	0	0	0	0	0	0	0
338	0	0	0	0	0	62	58	4	0	104.9	0	9	0	0	0	0	0	0
1113	0	0	0	0	0	64	61	3	0	66.5	0	0	0	0	0	0	0	0
306	0	0	0	0	0	59	38	21	0	39.7	0	9	0	0	0	0	0	0
1062	0	0	0	0	0	64	60	4	0	84.8	0	0	0	0	0	0	0	0
1225	0	0	0	0	0	64	60	4	0	84.8	0	0	0	0	0	0	0	0
307	0	0	0	0	0	59	54	5	0	49.7	0	9	0	0	0	0	0	0
309	1	0	0	0	0	59	59	1	0	18.8	1	9	0	0	0	0	0	0
324	0	0	0	0	0	61	59	2	0	88.9	0	0	0	0	0	0	0	0
325	0	0	0	0	0	61	57	4	0	62.5	0	0	0	0	0	0	0	0
1016	0	0	0	0	0	62	60	2	0	90.6	0	0	0	0	0	0	0	0
310	0	0	0	0	0	60	54	6	0	63.1	0	9	0	0	0	0	0	0
1148	0	0	0	0	0	63	62	2	0	65.9	0	0	0	0	0	0	0	0
1079	0	0	0	0	0	62	57	5	0	47.6	0	0	0	0	0	0	0	0
1193	0	0	0	0	0	62	22	40	0	108.5	0	0	0	0	0	0	0	0
327	0	0	0	0	0	61	41	20	0	67.9	0	0	0	0	0	0	0	0
329	0	0	0	0	0	61	51	10	0	48.5	0	0	0	0	0	0	0	0
279	0	0	0	0	0	57	57	1	0	65.6	0	9	0	0	0	0	0	0
298	0	0	0	0	0	58	57	1	0	112.4	0	9	0	0	0	0	0	0
1109	0	0	0	0	0	62	45	17	0	72	0	0	0	0	0	0	0	0
314	0	0	0	0	0	60	58	2	0	57.8	0	0	0	0	0	0	0	0
1274	0	0	0	0	0	61	37	24	0	12.1	1	0	0	0	0	0	0	0
299	0	0	0	0	0	58	52	6	0	94.6	0	9	0	0	0	0	0	0
1011	0	0	0	0	0	62	60	2	0	49.6	0	0	0	0	0	0	0	0
1097	0	0	0	0	0	60	42	18	0	60.8	0	0	0	0	0	0	0	0
300	0	0	0	0	0	58	56	2	0	70.4	0	0	0	0	0	0	0	0
295	0	0	0	0	0	58	56	2	0	80.8	0	9	0	0	0	0	0	0
294	0	0	0	0	0	58	56	2	0	37.1	0	9	0	0	0	0	0	0
305	0	0	0	0	0	59	57	2	0	48.2	0	0	0	0	0	0	0	0
302	0	0	0	0	0	59	57	2	0	49.5	0	0	0	0	0	0	0	0
1266	0	0	0	0	0	59	23	36	0	57.2	0	0	0	0	0	0	0	0
242	0	0	0	0	0	55	28	27	0	59.2	0	9	0	0	0	0	0	0
274	0	0	0	0	0	56	48	8	0	60.6	0	9	0	0	0	0	0	0
1176	0	0	0	0	0	59	57	2	0	56.1	0	0	0	0	0	0	0	0
266	0	0	0	0	0	56	54	1	0	35.5	0	9	0	0	0	0	0	0
290	0	0	0	0	0	58	53	5	0	89.6	0	0	0	0	0	0	0	0
258	0	0	0	0	0	56	41	15	0	92.9	0	9	0	0	0	0	0	0
1030	0	0	0	0	0	58	52	6	0	62.5	0	0	0	0	0	0	0	0
225	1	0	0	0	0	54	50	4	0	77.9	0	9	0	0	0	0	0	0
268	0	0	0	0	0	56	53	3	0	89.8	0	9	0	0	0	0	0	0
228	0	0	0	0	0	54	52	2	0	62	0	9	0	0	0	0	0	0
226	0	0	0	0	0	54	41	13	0	55	0	9	0	0	0	0	0	0
1107	0	0	0	0	0	57	55	2	0	44	0	0	0	0	0	0	0	0
237	0	0	0	0	0	55	50	5	0	82.1	0	9	0	0	0	0	0	0
261	0	0	0	0	0	56	56	1	0	63.8	0	0	0	0	0	0	0	0
1004	0	0	0	0	0	58	56	2	0	39.9	0	0	0	0	0	0	0	0
1007	0	0	0	0	0	57	24	33	0	63.9	0	0	0	0	0	0	0	0
1161	0	0	0	0	0	57	52	5	0	79.2	0	0	0	0	0	0	0	0
234	1	0	0	0	0	54	5	49	0	126.3	0	9	0	0	0	0	0	0
1086	0	0	0	0	0	56	48	8	0	55.4	0	0	0	0	0	0	0	0
262	0	0	0	0	0	56	51	5	0	60	0	0	0	0	0	0	0	0
222	0	0	0	0	0	53	49	4	0	38.4	0	9	0	0	0	0	0	0
229	0	0	0	0	0	54	53	1	0	77.3	0	9	0	0	0	0	0	0
243	0	0	0	0	0	55	52	3	0	78	0	0	0	0	0	0	0	0
1170	0	0	0	0	0	56	53	3	0	49.6	0	0	0	0	0	0	0	0
193	0	0	0	0	0	51	16	35	0	999	0	9	0	0	0	0	0	0
1129	0	0	0	0	0	55	53	2	0	73.8	0	0	0	0	0	0	0	0
208	0	0	0	0	0	52	52	1	0	112.9	0	9	0	0	0	0	0	0
233	0	0	0	0	0	54	52	1	0	64.3	0	0	0	0	0	0	0	0
192	0	0	0	0	0	50	46	4	0	83.7	0	9	0	0	0	0	0	0
209	1	0	0	0	0	52	50	2	0	88.5	0	9	0	0	0	0	0	0
1127	0	0	0	0	0	55	20	35	0	54.8	0	0	0	0	0	0	0	0
1202	0	0	0	0	0	54	53	1	0	87.1	0	0	0	0	0	0	0	0
211	0	0	0	0	0	52	50	2	0	83	0	9	0	0	0	0	0	0
1034	0	0	0	0	0	54	51	3	0	73.9	0	0	0	0	0	0	0	0
220	1	0	0	0	0	53	51	2	0	36.8	0	0	0	0	0	0	0	0
173	0	0	0	0	0	49	46	3	0	33	0	9	0	0	0	0	0	0
1117	0	0	0	0	0	52	51	1	0	73.9	0	0	0	0	0	0	0	0
183	0	0	0	0	0	50	48	2	0	57.6	0	9	0	0	0	0	0	0
212	0	0	0	0	0	52	47	5	0	68.3	0	0	0	0	0	0	0	0
1200	0	0	0	0	0	52	48	4	0	59	0	0	0	0	0	0	0	0
1212	0	0	0	0	0	53	38	15	0	55.4	0	0	0	0	0	0	0	0
174	0	0	0	0	0	49	49	1	0	77.8	0	9	0	0	0	0	0	0
186	0	0	0	0	0	50	44	6	0	88.3	0	0	0	0	0	0	0	0
196	0	0	0	0	0	51	49	2	0	55.2	0	0	0	0	0	0	0	0
1239	0	0	0	0	0	53	51	2	0	41.1	0	0	0	0	0	0	0	0
1186	0	0	0	0	0	51	51	1	0	55.7	0	0	0	0	0	0	0	0
1020	0	0	0	0	0	51	48	3	0	78.6	0	0	0	0	0	0	0	0
162	0	0	0	0	0	49	46	3	0	99.6	0	9	0	0	0	0	0	0
179	1	0	0	0	0	49	44	5	0	7.1	1	0	0	0	0	0	0	0
175	0	0	0	0	0	49	46	3	0	77.8	0	0	0	0	0	0	0	0
1215	0	0	0	0	0	50	48	2	0	126.8	0	0	0	0	0	0	0	0
178	0	0	0	0	0	49	48	1	0	62.8	0	0	0	0	0	0	0	0
148	0	0	0	0	0	48	47	1	0	89.2	0	0	0	0	0	0	0	0
134	0	0	0	0	0	46	41	5	0	72.3	0	9	0	0	0	0	0	0
159	0	0	0	0	0	48	42	6	0	60	0	9	0	0	0	0	0	0
1154	0	0	0	0	0	50	36	14	0	43.5	0	0	0	0	0	0	0	0
132	0	0	0	0	0	46	44	2	0	63.2	0	9	0	0	0	0	0	0
109	0	0	0	0	0	44	43	1	0	47.7	0	9	0	0	0	0	0	0
136	0	0	0	0	0	47	44	3	0	50.6	0	0	0	0	0	0	0	0
1267	0	0	0	0	0	48	45	3	0	48.7	0	0	0	0	0	0	0	0
1084	0	0	0	0	0	49	37	12	0	66.2	0	0	0	0	0	0	0	0
127	0	0	0	0	0	46	43	3	0	84.4	0	0	0	0	0	0	0	0
117	0	0	0	0	0	44	42	2	0	66.5	0	0	0	0	0	0	0	0
101	0	0	0	0	0	43	39	4	0	55.7	0	9	0	0	0	0	0	0
86	0	0	0	0	0	42	40	2	0	74.9	0	9	0	0	0	0	0	0
112	0	0	0	0	0	44	42	2	0	47.7	0	0	0	0	0	0	0	0
1159	0	0	0	0	0	47	27	20	0	71.5	0	0	0	0	0	0	0	0
1105	0	0	0	0	0	46	45	1	0	56.7	0	0	0	0	0	0	0	0
79	0	0	0	0	0	41	24	17	0	77.9	0	9	0	0	0	0	0	0
100	0	0	0	0	0	43	39	4	0	36.5	0	9	0	0	0	0	0	0
85	0	0	0	0	0	41	38	3	0	999	0	9	0	0	0	0	0	0
107	0	0	0	0	0	44	41	3	0	81.9	0	0	0	0	0	0	0	0
84	0	0	0	0	0	41	31	10	0	40.8	0	9	0	0	0	0	0	0
95	0	0	0	0	0	43	38	5	0	98.3	0	9	0	0	0	0	0	0
93	0	0	0	0	0	42	39	3	0	71.1	0	9	0	0	0	0	0	0
1065	0	0	0	0	0	45	42	3	0	59.5	0	0	0	0	0	0	0	0
82	0	0	0	0	0	41	34	6	0	68.1	0	0	0	0	0	0	0	0
105	0	0	0	0	0	43	42	1	0	51.8	0	0	0	0	0	0	0	0
89	1	0	0	0	0	42	40	2	0	43	0	0	0	0	0	0	0	0
1221	0	0	0	0	0	44	42	2	0	61	0	0	0	0	0	0	0	0
78	0	0	0	0	0	41	37	4	0	81.9	0	9	0	0	0	0	0	0
1185	0	0	0	0	0	43	41	2	0	56	0	0	0	0	0	0	0	0
70	0	0	0	0	0	39	38	1	0	35.8	0	9	0	0	0	0	0	0
1123	0	0	0	0	0	43	40	3	0	64.3	0	0	0	0	0	0	0	0
1275	0	0	0	0	0	43	40	3	0	26.9	1	0	0	0	0	0	0	0
64	0	0	0	0	0	39	23	16	0	82.7	0	9	0	0	0	0	0	0
1178	0	0	0	0	0	42	28	14	0	70.9	0	0	0	0	0	0	0	0
1263	0	0	0	0	0	42	39	3	0	85.2	0	0	0	0	0	0	0	0
56	0	0	0	0	0	37	36	1	0	999	0	9	0	0	0	0	0	0
67	0	0	0	0	0	39	36	3	0	62.7	0	0	0	0	0	0	0	0
69	0	0	0	0	0	39	27	12	0	50.3	0	0	0	0	0	0	0	0
60	0	0	0	0	0	38	36	2	0	72.6	0	0	0	0	0	0	0	0
1167	0	0	0	0	0	40	39	1	0	64.3	0	0	0	0	0	0	0	0
54	0	0	0	0	0	37	35	2	0	34.1	0	9	0	0	0	0	0	0
52	0	0	0	0	0	37	37	1	0	43.1	0	9	0	0	0	0	0	0
51	0	0	0	0	0	37	35	2	0	103.1	0	9	0	0	0	0	0	0
50	0	0	0	0	0	37	36	1	0	74.7	0	0	0	0	0	0	0	0
1162	0	0	0	0	0	38	36	2	0	57.7	0	0	0	0	0	0	0	0
44	0	0	0	0	0	35	29	6	0	44.3	0	9	0	0	0	0	0	0
57	0	0	0	0	0	37	34	3	0	26.7	1	0	0	0	0	0	0	0
38	0	0	0	0	0	33	33	1	0	73.1	0	9	0	0	0	0	0	0
42	0	0	0	0	0	34	24	10	0	73.5	0	9	0	0	0	0	0	0
37	0	0	0	0	0	33	23	10	0	32	0	0	0	0	0	0	0	0
1269	0	0	0	0	0	34	28	6	0	64.1	0	0	0	0	0	0	0	0
31	0	0	0	0	0	30	16	14	0	40.3	0	0	0	0	0	0	0	0
23	0	0	0	0	0	28	27	1	0	999	0	0	0	0	0	0	0	0
27	0	0	0	0	0	28	25	3	0	53.1	0	0	0	0	0	0	0	0
19	0	0	0	0	0	27	25	2	0	47.3	0	0	0	0	0	0	0	0
11	0	0	0	0	0	24	20	4	0	63.2	0	9	0	0	0	0	0	0
1033	0	0	0	0	0	27	25	2	0	70.3	0	0	0	0	0	0	0	0
1143	0	0	0	0	0	28	27	1	0	69.1	0	0	0	0	0	0	0	0
13	0	0	0	0	0	25	18	7	0	60	0	0	0	0	0	0	0	0
12	0	0	0	0	0	24	22	2	0	57.9	0	9	0	0	0	0	0	0
1088	0	0	0	0	0	20	15	5	0	69.1	0	0	0	0	0	0	0	0
402	0	0	0	0	0	68	58	10	0	52.6	0	0	1	0	0	c.376A>G	p.Ser126Gly	2
389	0	0	0	0	0	66	64	2	0	43.2	0	0	1	0	0	c.801+21T>C	0	2
341	0	0	0	0	0	62	60	2	0	60.6	0	9	1	c.937G>T	p.Asp313Tyr	0	0	3
238	0	0	0	0	0	55	53	2	0	96.7	0	9	1	0	0	c.48T>G	p.Leu16Leu	2
245	0	0	0	0	0	55	50	5	0	72.9	0	9	1	0	0	c.123C>T	p.Thr41Thr	2
198	0	0	0	0	0	51	49	2	0	68.8	0	9	1	0	0	c.-8C>G	0	2
164	0	0	0	0	0	49	49	1	0	78.9	0	9	1	0	0	c.999+11_12ins11+999+16_20del5	0	2
143	0	0	0	0	0	47	44	3	0	62.4	0	9	1	c.937G>T	p.Asp313Tyr	0	0	3
1010	0	0	0	0	0	47	45	2	0	51.5	0	0	1	c.937G>T	p.Asp313Tyr	0	0	3
48	0	0	0	0	0	36	35	1	0	57.4	0	9	1	0	0	c.-40G>C	0	2
30	0	0	0	0	0	30	24	5	0	59.2	0	9	1	c.352C>T	p.Arg118Cys	0	0	4
337	1	0	0	0	0	62	60	2	0	54	0	0	2	0	0	0	0	0
16	1	0	0	0	0	26	25	1	0	49.4	0	0	2	0	0	0	0	0
353	1	0	0	0	0	63	58	5	0	62.2	0	0	2	0	0	0	0	0
441	1	0	0	0	0	74	65	9	0	43	0	0	2	0	0	0	0	0
1188	1	0	0	0	0	67	63	4	0	56	0	0	2	0	0	9	0	0
340	1	0	0	0	0	62	60	2	0	57.2	0	0	2	0	0	0	0	0
308	1	0	0	0	0	59	58	1	0	51.7	0	0	2	0	0	0	0	0
257	1	0	0	0	0	56	54	2	0	57.6	0	0	2	0	0	0	0	0
210	1	0	0	0	0	52	50	2	0	75.6	0	0	2	0	0	0	0	0
191	1	0	0	0	0	50	40	10	0	79.3	0	0	2	0	0	0	0	0
91	1	0	0	0	0	42	40	2	0	69	0	0	2	0	0	0	0	0
24	1	0	0	0	0	28	20	8	0	66.2	0	0	2	0	0	0	0	0
163	1	0	0	0	0	49	47	2	0	84.1	0	9	2	0	0	0	0	0
367	1	0	0	0	0	64	54	10	0	143.4	0	0	2	0	0	0	0	0
446	1	1	2	0	0	75	73	2	0	87.4	0	0	2	0	0	0	0	0
256	1	0	0	0	0	56	54	2	0	59.6	0	0	2	0	0	0	0	0
1096	1	0	0	0	0	35	25	10	0	87.1	0	0	2	0	0	9	0	0
460	1	0	0	0	0	81	81	1	0	74.4	0	9	2	0	0	0	0	0
1145	1	0	0	0	0	77	69	8	0	58.8	0	0	2	0	0	9	0	0
383	1	0	0	0	0	65	64	1	0	80.3	0	0	2	0	0	0	0	0
296	1	0	0	0	0	58	57	1	0	105	0	0	2	0	0	0	0	0
1163	1	0	0	0	0	58	56	2	0	87.7	0	0	2	0	0	9	0	0
111	1	0	0	0	0	44	34	10	0	81.6	0	9	2	0	0	0	0	0
15	1	0	0	0	0	25	23	2	0	71.1	0	9	2	0	0	0	0	0
1207	1	0	0	0	0	61	58	3	0	88.1	0	0	2	0	0	9	0	0
1083	1	0	0	0	0	56	54	2	0	52.7	0	0	2	0	0	9	0	0
218	1	0	0	0	0	53	52	1	0	54.5	0	0	2	0	0	0	0	0
1237	1	0	0	0	0	52	23	29	0	72.6	0	0	2	0	0	9	0	0
1191	1	0	0	0	0	52	51	1	0	125	0	0	2	0	0	9	0	0
1012	1	0	0	0	0	46	44	2	0	86.2	0	0	2	0	0	9	0	0
104	1	0	0	0	0	43	33	10	0	74.7	0	0	2	0	0	0	0	0
1204	1	0	0	0	0	45	36	9	0	65.5	0	0	2	0	0	9	0	0
25	1	0	0	0	0	28	26	2	0	46.2	0	0	2	0	0	0	0	0
281	1	0	0	0	0	57	55	2	0	50.9	0	0	2	0	0	0	0	0
197	1	0	0	0	0	51	50	1	0	106.1	0	0	2	0	0	0	0	0
156	1	0	0	0	0	48	33	15	0	74.3	0	0	2	0	0	0	0	0
157	1	0	0	0	0	48	42	6	0	46.5	0	0	2	0	0	0	0	0
113	1	0	0	0	0	44	39	5	0	42.1	0	0	2	0	0	0	0	0
450	1	1	2	0	0	76	73	3	0	104.4	0	9	2	0	0	0	0	0
439	1	1	2	0	0	73	71	2	0	72.7	0	0	2	0	0	0	0	0
1051	1	1	2	0	0	70	66	4	0	70.5	0	0	2	0	0	9	0	0
1103	1	1	2	0	0	67	66	1	0	52.1	0	0	2	0	0	9	0	0
1140	1	1	2	0	0	65	63	2	0	107	0	0	2	0	0	9	0	0
1061	1	1	2	0	0	58	56	2	0	60.6	0	0	2	0	0	9	0	0
1248	1	1	2	0	0	53	43	10	0	41.4	0	0	2	0	0	9	0	0
166	1	1	2	0	0	49	49	1	0	105.3	0	9	2	0	0	0	0	0
1081	1	1	2	0	0	49	46	3	0	30.5	0	0	2	0	0	9	0	0
1211	1	1	2	0	0	47	17	30	0	52.1	0	0	2	0	0	9	0	0
97	1	1	2	0	0	43	40	3	0	66.8	0	9	2	0	0	0	0	0
1068	1	1	1	0	0	45	43	2	0	84.1	0	0	2	0	0	9	0	0
1074	1	1	2	0	0	42	32	10	0	61.2	0	0	2	0	0	9	0	0
449	1	0	0	0	0	76	74	2	0	114.7	0	9	2	0	0	0	0	0
1217	1	0	0	0	0	78	73	5	0	102.6	0	9	2	0	0	9	0	0
443	1	0	0	0	0	74	72	2	0	38.2	0	9	2	0	0	0	0	0
436	1	0	0	0	0	73	72	1	0	89.7	0	0	2	0	0	0	0	0
1168	1	0	0	0	0	75	72	3	0	58.6	0	0	2	0	0	9	0	0
1223	1	0	0	0	0	75	60	15	0	64.6	0	0	2	0	0	9	0	0
433	1	0	0	0	0	72	71	1	0	48.1	0	0	2	0	0	0	0	0
426	1	0	0	0	0	70	64	6	0	103	0	0	2	0	0	0	0	0
407	1	0	0	0	0	68	66	2	0	95.4	0	9	2	0	0	0	0	0
420	1	0	0	0	0	70	68	2	0	61	0	0	2	0	0	0	0	0
404	1	0	0	0	0	68	67	1	0	69.1	0	0	2	0	0	0	0	0
410	1	0	0	0	0	69	63	6	0	87.5	0	0	2	0	0	0	0	0
390	1	0	0	0	0	66	56	10	0	66.9	0	9	2	0	0	0	0	0
1060	1	0	0	0	0	70	67	3	0	64	0	0	2	0	0	9	0	0
1166	1	0	0	0	0	70	68	2	0	69.8	0	0	2	0	0	9	0	0
401	1	0	0	0	0	67	62	5	0	79.1	0	0	2	0	0	0	0	0
394	1	0	0	0	0	66	30	36	0	66.7	0	9	2	0	0	0	0	0
396	1	0	0	0	0	67	65	2	0	48.2	0	0	2	0	0	0	0	0
400	1	0	0	0	0	67	18	49	0	63.4	0	0	2	0	0	0	0	0
387	1	0	0	0	0	65	64	1	0	100	0	9	2	0	0	0	0	0
1044	1	0	0	0	0	67	62	5	0	70.4	0	0	2	0	0	9	0	0
362	1	0	0	0	0	64	54	10	0	80.5	0	9	2	0	0	0	0	0
348	1	0	0	0	0	63	53	10	0	95.4	0	9	2	0	0	0	0	0
377	1	0	0	0	0	65	48	17	0	67.2	0	0	2	0	0	0	0	0
385	1	0	0	0	0	65	61	4	0	45.1	0	0	2	0	0	0	0	0
347	1	0	0	0	0	63	62	1	0	65.1	0	9	2	0	0	0	0	0
317	1	0	0	0	0	60	58	2	0	42.3	0	9	2	0	0	0	0	0
335	1	0	0	0	0	62	61	1	0	83.3	0	9	2	0	0	0	0	0
313	1	0	0	0	0	60	59	1	0	46.5	0	9	2	0	0	0	0	0
320	1	0	0	0	0	60	51	9	0	999	0	9	2	0	0	0	0	0
345	1	0	0	0	0	63	58	5	0	67.8	0	0	2	0	0	0	0	0
1214	1	0	0	0	0	63	63	1	0	184.3	0	0	2	0	0	0	0	0
1137	1	0	0	0	0	63	56	7	0	49.4	0	0	2	0	0	9	0	0
322	1	0	0	0	0	61	59	2	0	61.4	0	0	2	0	0	0	0	0
275	1	0	0	0	0	57	56	1	0	59.3	0	9	2	0	0	0	0	0
311	1	0	0	0	0	60	58	2	0	54.6	0	0	2	0	0	0	0	0
1052	1	0	0	0	0	61	48	13	0	92	0	0	2	0	0	9	0	0
289	1	0	0	0	0	58	54	4	0	59.7	0	0	2	0	0	0	0	0
1261	1	0	0	0	0	60	55	5	0	48.7	0	0	2	0	0	9	0	0
285	1	0	0	0	0	57	50	7	0	96.3	0	9	2	0	0	0	0	0
1255	1	0	0	0	0	60	58	2	0	52.2	0	0	2	0	0	9	0	0
1153	1	0	0	0	0	60	45	15	0	76.7	0	0	2	0	0	9	0	0
1160	1	0	0	0	0	59	58	1	0	53.2	0	0	2	0	0	9	0	0
250	1	0	0	0	0	55	42	13	0	62.6	0	9	2	0	0	0	0	0
1253	1	0	0	0	0	60	55	5	0	84.9	0	0	2	0	0	9	0	0
287	1	0	0	0	0	57	55	2	0	44.5	0	0	2	0	0	0	0	0
1172	1	0	0	0	0	59	52	7	0	82.3	0	0	2	0	0	9	0	0
282	1	0	0	0	0	57	46	11	0	75.7	0	0	2	0	0	0	0	0
288	1	0	0	0	0	58	57	1	0	42.3	0	0	2	0	0	0	0	0
267	1	0	0	0	0	56	54	2	0	86.9	0	0	2	0	0	0	0	0
251	1	0	0	0	0	55	53	2	0	61.2	0	9	2	0	0	0	0	0
1208	1	0	0	0	0	58	28	30	0	80.7	0	0	2	0	0	9	0	0
1141	1	0	0	0	0	58	49	9	0	64.9	0	0	2	0	0	9	0	0
249	1	0	0	0	0	55	52	3	0	71.2	0	9	2	0	0	0	0	0
217	1	0	0	0	0	53	44	9	0	88.4	0	9	2	0	0	0	0	0
1201	1	0	0	0	0	57	52	5	0	83.8	0	0	2	0	0	9	0	0
1175	1	0	0	0	0	58	57	1	0	51.6	0	0	2	0	0	9	0	0
1047	1	0	0	0	0	57	54	3	0	84.4	0	0	2	0	0	9	0	0
1126	1	0	0	0	0	57	53	4	0	79.3	0	0	2	0	0	9	0	0
1259	1	0	0	0	0	58	53	5	0	66	0	0	2	0	0	9	0	0
1205	1	0	0	0	0	57	43	14	0	52.4	0	0	2	0	0	9	0	0
1056	1	0	0	0	0	56	48	8	0	89.4	0	0	2	0	0	9	0	0
253	1	0	0	0	0	55	47	8	0	54.3	0	0	2	0	0	0	0	0
1120	1	0	0	0	0	56	49	7	0	42.8	0	0	2	0	0	9	0	0
1210	1	0	0	0	0	55	51	4	0	100.3	0	0	2	0	0	9	0	0
1252	1	0	0	0	0	55	51	4	0	48.9	0	0	2	0	0	9	0	0
1073	1	0	0	0	0	56	48	8	0	36	0	0	2	0	0	9	0	0
185	1	0	0	0	0	50	45	4	0	120.2	0	9	2	0	0	0	0	0
206	1	0	0	0	0	52	51	1	0	70.7	0	9	2	0	0	0	0	0
1018	1	0	0	0	0	54	51	3	0	86.9	0	0	2	0	0	9	0	0
1036	1	0	0	0	0	55	45	10	0	77	0	0	2	0	0	9	0	0
1230	1	0	0	0	0	55	49	6	0	67.5	0	0	2	0	0	9	0	0
219	1	0	0	0	0	53	46	7	0	42.7	0	0	2	0	0	0	0	0
1070	1	0	0	0	0	54	44	10	0	58.9	0	0	2	0	0	9	0	0
204	1	0	0	0	0	52	45	7	0	44.2	0	0	2	0	0	0	0	0
180	1	0	0	0	0	50	49	1	0	67.7	0	9	2	0	0	0	0	0
1132	1	0	0	0	0	53	46	7	0	100.8	0	0	2	0	0	9	0	0
1108	1	0	0	0	0	54	52	2	0	55.2	0	0	2	0	0	9	0	0
215	1	0	0	0	0	53	48	5	0	34.7	0	0	2	0	0	0	0	0
1053	1	0	0	0	0	53	50	3	0	80.8	0	0	2	0	0	9	0	0
1250	1	0	0	0	0	54	53	1	0	75	0	0	2	0	0	9	0	0
170	1	0	0	0	0	49	44	5	0	69.9	0	9	2	0	0	0	0	0
147	1	0	0	0	0	48	46	2	0	32.6	0	9	2	0	0	0	0	0
1244	1	0	0	0	0	53	48	5	0	77	0	0	2	0	0	9	0	0
160	1	0	0	0	0	49	43	6	0	152.7	0	9	2	0	0	0	0	0
199	1	0	0	0	0	51	46	6	0	55.5	0	0	2	0	0	0	0	0
1190	1	0	0	0	0	52	51	1	0	68.3	0	9	2	0	0	9	0	0
146	1	0	0	0	0	48	42	6	0	80.3	0	9	2	0	0	0	0	0
1087	1	0	0	0	0	52	51	1	0	78.1	0	0	2	0	0	9	0	0
1147	1	0	0	0	0	51	46	5	0	55.2	0	0	2	0	0	9	0	0
187	1	0	0	0	0	50	48	2	0	40.5	0	0	2	0	0	0	0	0
128	1	0	0	0	0	46	39	7	0	38.4	0	9	2	0	0	0	0	0
126	1	0	0	0	0	46	45	1	0	61.9	0	9	2	0	0	0	0	0
150	1	0	0	0	0	48	26	22	0	66	0	0	2	0	0	0	0	0
137	1	0	0	0	0	47	42	5	0	98.7	0	9	2	0	0	0	0	0
140	1	0	0	0	0	47	38	9	0	82.2	0	9	2	0	0	0	0	0
1136	1	0	0	0	0	49	47	2	0	120.2	0	0	2	0	0	9	0	0
1199	1	0	0	0	0	49	48	1	0	37.1	0	0	2	0	0	9	0	0
135	1	0	0	0	0	47	45	2	0	48.7	0	0	2	0	0	0	0	0
115	1	0	0	0	0	44	37	7	0	49.3	0	9	2	0	0	0	0	0
1067	1	0	0	0	0	47	46	1	0	67.9	0	0	2	0	0	9	0	0
108	1	0	0	0	0	44	43	1	0	191.9	0	9	2	0	0	0	0	0
90	1	0	0	0	0	42	41	1	0	69.9	0	9	2	0	0	0	0	0
119	1	0	0	0	0	44	42	2	0	59.3	0	0	2	0	0	0	0	0
1124	1	0	0	0	0	45	45	1	0	44	0	0	2	0	0	9	0	0
77	1	0	0	0	0	41	41	1	0	52	0	9	2	0	0	0	0	0
116	1	0	0	0	0	44	42	2	0	70.2	0	0	2	0	0	0	0	0
87	1	0	0	0	0	42	39	3	0	74.3	0	9	2	0	0	0	0	0
1196	1	0	0	0	0	44	42	2	0	102	0	0	2	0	0	9	0	0
1085	1	0	0	0	0	43	41	2	0	57	0	0	2	0	0	9	0	0
75	1	0	0	0	0	40	37	3	0	63.5	0	9	2	0	0	0	0	0
72	1	0	0	0	0	39	37	2	0	46.1	0	9	2	0	0	0	0	0
1174	1	0	0	0	0	43	38	5	0	66	0	0	2	0	0	9	0	0
1122	1	0	0	0	0	42	37	5	0	76.6	0	0	2	0	0	9	0	0
58	1	0	0	0	0	38	35	3	0	137.5	0	9	2	0	0	0	0	0
71	1	0	0	0	0	39	37	1	0	111.1	0	0	2	0	0	0	0	0
68	1	0	0	0	0	39	37	2	0	49.2	0	0	2	0	0	0	0	0
1238	1	0	0	0	0	39	19	20	0	76.4	0	0	2	0	0	9	0	0
1111	1	0	0	0	0	38	34	4	0	89.2	0	0	2	0	0	9	0	0
55	1	0	0	0	0	37	33	4	0	61.2	0	0	2	0	0	0	0	0
1063	1	0	0	0	0	36	28	8	0	78.3	0	0	2	0	0	9	0	0
1009	1	0	0	0	0	35	29	6	0	61.9	0	0	2	0	0	9	0	0
1031	1	0	0	0	0	33	16	17	0	138.2	0	0	2	0	0	9	0	0
26	1	0	0	0	0	28	5	23	0	59.3	0	9	2	0	0	0	0	0
17	1	0	0	0	0	26	24	2	0	56.7	0	9	2	0	0	0	0	0
1121	1	0	0	0	0	27	21	6	0	70.8	0	0	2	0	0	9	0	0
1024	1	0	0	0	0	24	22	2	0	62.4	0	0	2	0	0	9	0	0
1119	1	0	0	0	0	21	18	3	0	61.2	0	0	2	0	0	9	0	0
151	0	0	0	Sjogren	0	48	46	2	1	65.7	0	9	0	0	0	0	0	0
1037	0	1	2	Sjogren	0	63	57	6	1	60.9	0	0	0	0	0	0	0	0
423	0	0	0	Sjogren	0	70	60	10	1	73.6	0	0	0	0	0	0	0	0
421	0	0	0	Sjogren	0	70	68	2	1	45.4	0	0	0	0	0	0	0	0
1241	0	0	0	Sjogren	0	31	17	14	1	58.6	0	0	0	0	0	0	0	0
1224	0	1	1	Sarcoido	0	44	31	13	1	56.1	0	0	0	0	0	0	0	0
158	1	0	0	Sarcoido	0	48	47	1	1	61.5	0	0	2	0	0	0	0	0
161	1	0	0	Sarcoido	0	49	48	1	1	59.1	0	0	2	0	0	0	0	0
61	1	0	0	Sarcoido	0	38	36	2	1	60.8	0	0	2	0	0	0	0	0
231	0	0	0	MGUS	0	54	26	28	1	49.2	0	9	0	0	0	0	0	0
1102	0	0	0	0	0	76	70	6	1	34.4	0	0	0	0	0	0	0	0
232	0	0	0	0	0	54	52	2	1	52.1	0	0	0	0	0	0	0	0
1222	0	0	0	0	0	62	59	3	1	32.8	0	0	0	0	0	0	0	0
1076	0	0	0	0	0	46	45	1	1	54.3	0	0	0	0	0	0	0	0
358	0	0	0	0	0	63	61	2	1	34.1	0	0	0	0	0	0	0	0
139	0	0	0	0	0	47	45	2	1	34	0	9	0	0	0	0	0	0
431	0	0	0	0	0	71	70	1	1	65.4	0	0	0	0	0	0	0	0
1165	0	0	0	0	0	71	67	4	1	157	0	0	0	0	0	0	0	0
354	0	0	0	0	0	63	61	2	1	54.4	0	0	0	0	0	0	0	0
321	0	0	0	0	0	61	51	10	1	67.1	0	9	0	0	0	0	0	0
1001	0	0	0	0	0	63	52	11	1	66.8	0	0	0	0	0	0	0	0
195	0	0	0	0	0	51	48	3	1	93.3	0	9	0	0	0	0	0	0
1231	0	0	0	0	0	45	40	5	1	53.9	0	0	0	0	0	0	0	0
1021	0	0	0	0	0	37	23	14	1	56.4	0	0	0	0	0	0	0	0
22	0	0	0	0	0	28	27	1	1	42.1	0	0	0	0	0	0	0	0
350	1	0	0	0	0	63	53	10	1	60.5	0	0	2	0	0	0	0	0
1183	1	0	0	0	0	50	49	1	1	65.2	0	0	2	0	0	9	0	0
278	0	0	0	0	0	57	55	2	1	70.7	0	9	0	0	0	0	0	0
202	0	0	0	0	0	52	49	3	1	76.9	0	0	0	0	0	0	0	0
1182	0	0	0	0	0	51	46	5	1	98	0	0	0	0	0	0	0	0
7	0	0	0	0	0	20	18	2	1	91.3	0	0	0	0	0	0	0	0
388	0	0	0	0	0	66	64	2	1	66.5	0	0	0	0	0	0	0	0
106	0	0	0	0	0	44	43	1	1	105.1	0	9	0	0	0	0	0	0
452	0	0	0	0	0	76	74	2	1	60	0	0	0	0	0	0	0	0
152	0	0	0	0	0	48	45	3	1	54.6	0	0	0	0	0	0	0	0
1247	0	0	0	0	0	44	43	1	1	57.5	0	0	0	0	0	0	0	0
365	0	0	0	0	0	64	62	2	1	56.7	0	0	0	0	0	0	0	0
293	0	0	0	0	0	58	56	1	1	178.9	0	9	0	0	0	0	0	0
167	0	0	0	0	0	49	47	2	1	79.5	0	0	0	0	0	0	0	0
1003	1	0	0	0	0	44	43	1	1	33.9	0	0	0	0	0	0	0	0
406	0	0	0	0	0	68	63	5	1	61	0	0	0	0	0	0	0	0
371	0	0	0	0	0	64	62	2	1	80.9	0	0	0	0	0	0	0	0
1094	0	0	0	0	0	64	52	12	1	71.4	0	0	0	0	0	0	0	0
334	0	0	0	0	0	61	57	4	1	81.3	0	9	0	0	0	0	0	0
1071	0	1	2	0	0	76	72	4	1	53.5	0	0	0	0	0	0	0	0
430	0	1	2	0	0	71	63	8	1	42	0	0	0	0	0	0	0	0
1152	1	1	2	0	0	69	67	1	1	108.8	0	0	0	0	0	0	0	0
391	0	1	2	0	0	66	64	2	1	73.3	0	0	0	0	0	0	0	0
1218	0	1	2	0	0	46	40	6	1	74.8	0	0	0	0	0	0	0	0
10	0	1	2	0	0	23	18	5	1	45.8	0	0	0	0	0	0	0	0
445	0	0	0	0	0	74	67	7	1	43	0	9	0	0	0	0	0	0
1023	0	0	0	0	0	75	69	6	1	56.7	0	0	0	0	0	0	0	0
427	0	0	0	0	0	70	68	2	1	89.5	0	9	0	0	0	0	0	0
418	0	0	0	0	0	70	66	4	1	66.3	0	0	0	0	0	0	0	0
405	0	0	0	0	0	68	67	1	1	58.5	0	9	0	0	0	0	0	0
1002	0	0	0	0	0	70	65	5	1	42.7	0	0	0	0	0	0	0	0
398	0	0	0	0	0	67	65	2	1	83.5	0	0	0	0	0	0	0	0
384	0	0	0	0	0	65	16	49	1	34	0	9	0	0	0	0	0	0
1040	0	0	0	0	0	68	65	3	1	75.3	0	0	0	0	0	0	0	0
392	0	0	0	0	0	66	60	6	1	54.7	0	0	0	0	0	0	0	0
351	0	0	0	0	0	63	38	25	1	52.2	0	9	0	0	0	0	0	0
1189	0	0	0	0	0	68	48	20	1	41.8	0	0	0	0	0	0	0	0
1249	0	0	0	0	0	68	51	17	1	73.1	0	0	0	0	0	0	0	0
373	0	0	0	0	0	64	61	3	1	55	0	9	0	0	0	0	0	0
359	0	0	0	0	0	64	60	4	1	59	0	9	0	0	0	0	0	0
369	0	0	0	0	0	64	61	3	1	108	0	9	0	0	0	0	0	0
374	0	0	0	0	0	65	62	3	1	49.8	0	0	0	0	0	0	0	0
1101	0	0	0	0	0	64	34	30	1	136.3	0	0	0	0	0	0	0	0
336	0	0	0	0	0	62	58	3	1	99	0	0	0	0	0	0	0	0
1232	0	0	0	0	0	64	54	10	1	62.1	0	0	0	0	0	0	0	0
328	0	0	0	0	0	61	60	1	1	95.7	0	9	0	0	0	0	0	0
332	0	0	0	0	0	61	57	4	1	64.1	0	0	0	0	0	0	0	0
315	0	0	0	0	0	60	58	2	1	95	0	9	0	0	0	0	0	0
1213	0	0	0	0	0	62	58	4	1	125.8	0	0	0	0	0	0	0	0
312	0	0	0	0	0	60	58	2	1	67.4	0	0	0	0	0	0	0	0
280	1	0	0	0	0	57	53	4	1	102.7	0	9	0	0	0	0	0	0
1138	0	0	0	0	0	61	15	46	1	59.8	0	0	0	0	0	0	0	0
273	0	0	0	0	0	56	49	7	1	100.9	0	9	0	0	0	0	0	0
239	0	0	0	0	0	55	52	3	1	53.3	0	9	0	0	0	0	0	0
259	0	0	0	0	0	56	26	30	1	84.7	0	9	0	0	0	0	0	0
286	0	0	0	0	0	57	50	7	1	101	0	0	0	0	0	0	0	0
1206	0	0	0	0	0	58	46	12	1	46.5	0	0	0	0	0	0	0	0
1149	0	0	0	0	0	58	52	6	1	89.5	0	0	0	0	0	0	0	0
1226	0	0	0	0	0	58	56	2	1	71.6	0	0	0	0	0	0	0	0
248	0	0	0	0	0	55	53	2	1	55	0	9	0	0	0	0	0	0
254	0	0	0	0	0	55	54	1	1	110.8	0	9	0	0	0	0	0	0
1032	0	0	0	0	0	58	55	3	1	67.5	0	0	0	0	0	0	0	0
1110	0	0	0	0	0	56	53	3	1	58.3	0	0	0	0	0	0	0	0
1057	0	0	0	0	0	55	51	4	1	45.2	0	0	0	0	0	0	0	0
244	0	0	0	0	0	55	54	1	1	67.1	0	0	0	0	0	0	0	0
1128	0	0	0	0	0	55	53	2	1	64.3	0	0	0	0	0	0	0	0
1118	0	0	0	0	0	55	53	2	1	65.9	0	0	0	0	0	0	0	0
1179	0	0	0	0	0	54	30	24	1	83.5	0	0	0	0	0	0	0	0
207	0	0	0	0	0	52	32	20	1	79.1	0	9	0	0	0	0	0	0
1233	0	0	0	0	0	54	50	4	1	75.9	0	0	0	0	0	0	0	0
1151	0	0	0	0	0	53	49	4	1	96.2	0	0	0	0	0	0	0	0
1066	0	0	0	0	0	54	52	2	1	50.6	0	0	0	0	0	0	0	0
1187	0	0	0	0	0	54	53	1	1	49.3	0	0	0	0	0	0	0	0
1090	0	0	0	0	0	53	23	30	1	65.6	0	0	0	0	0	0	0	0
177	0	0	0	0	0	49	35	14	1	37.9	0	9	0	0	0	0	0	0
184	0	0	0	0	0	50	45	5	1	57.6	0	9	0	0	0	0	0	0
1257	0	0	0	0	0	52	39	13	1	61.4	0	0	0	0	0	0	0	0
190	0	0	0	0	0	50	45	5	1	46.9	0	0	0	0	0	0	0	0
1220	0	0	0	0	0	51	47	4	1	62	0	0	0	0	0	0	0	0
1028	0	0	0	0	0	50	48	2	1	51.8	0	0	0	0	0	0	0	0
1243	0	0	0	0	0	49	45	4	1	70.1	0	0	0	0	0	0	0	0
130	0	0	0	0	0	46	45	1	1	56.8	0	9	0	0	0	0	0	0
176	0	0	0	0	0	49	48	1	1	54.6	0	0	0	0	0	0	0	0
133	0	0	0	0	0	46	39	7	1	67.1	0	9	0	0	0	0	0	0
145	0	0	0	0	0	48	46	2	1	91.1	0	0	0	0	0	0	0	0
1133	0	0	0	0	0	48	47	1	1	70.9	0	0	0	0	0	0	0	0
144	0	0	0	0	0	47	39	8	1	57.6	0	0	0	0	0	0	0	0
123	0	0	0	0	0	45	43	2	1	35.7	0	0	0	0	0	0	0	0
124	0	0	0	0	0	46	38	8	1	39.1	0	0	0	0	0	0	0	0
1260	0	0	0	0	0	47	45	2	1	79.6	0	0	0	0	0	0	0	0
121	0	0	0	0	0	45	44	1	1	58	0	0	0	0	0	0	0	0
96	0	0	0	0	0	43	41	2	1	64.2	0	9	0	0	0	0	0	0
1095	0	0	0	0	0	47	44	3	1	58.6	0	0	0	0	0	0	0	0
1197	0	0	0	0	0	46	44	2	1	81	0	0	0	0	0	0	0	0
118	0	0	0	0	0	44	43	1	1	40.8	0	0	0	0	0	0	0	0
102	0	0	0	0	0	43	42	1	1	50.6	0	0	0	0	0	0	0	0
94	0	0	0	0	0	42	38	4	1	72	0	0	0	0	0	0	0	0
92	1	0	0	0	0	42	40	2	1	54.6	0	0	0	0	0	0	0	0
1256	1	0	0	0	0	43	40	3	1	51.7	0	0	0	0	0	0	0	0
1234	0	0	0	0	0	41	13	28	1	105	0	0	0	0	0	0	0	0
1169	0	0	0	0	0	41	38	3	1	37.4	0	0	0	0	0	0	0	0
73	0	0	0	0	0	40	38	2	1	64.1	0	0	0	0	0	0	0	0
1173	0	0	0	0	0	41	37	4	1	63.3	0	0	0	0	0	0	0	0
63	0	0	0	0	0	38	37	1	1	2.8	1	9	0	0	0	0	0	0
47	0	0	0	0	0	36	33	3	1	51.1	0	9	0	0	0	0	0	0
59	0	0	0	0	0	38	33	5	1	59.3	0	0	0	0	0	0	0	0
40	0	0	0	0	0	34	32	2	1	999	0	9	0	0	0	0	0	0
1146	0	0	0	0	0	37	35	2	1	63.7	0	0	0	0	0	0	0	0
1242	0	0	0	0	0	37	36	1	1	59.7	0	0	0	0	0	0	0	0
41	0	0	0	0	0	34	32	2	1	33.9	0	0	0	0	0	0	0	0
1134	0	0	0	0	0	36	28	8	1	56.6	0	0	0	0	0	0	0	0
35	0	0	0	0	0	32	29	3	1	87	0	9	0	0	0	0	0	0
1050	0	0	0	0	0	35	25	10	1	45.9	0	0	0	0	0	0	0	0
36	0	0	0	0	0	33	31	2	1	43.7	0	0	0	0	0	0	0	0
1227	0	0	0	0	0	30	28	2	1	49	0	0	0	0	0	0	0	0
14	0	0	0	0	0	25	23	2	1	68.1	0	9	0	0	0	0	0	0
1046	0	0	0	0	0	30	29	1	1	70.1	0	0	0	0	0	0	0	0
20	0	0	0	0	0	27	26	1	1	49.3	0	0	0	0	0	0	0	0
1139	0	0	0	0	0	27	25	2	1	64.1	0	0	0	0	0	0	0	0
1015	0	0	0	0	0	27	18	9	1	50.4	0	0	0	0	0	0	0	0
6	1	0	0	0	0	19	13	6	1	30.7	0	9	0	0	0	0	0	0
8	0	0	0	0	0	20	2	18	1	85.8	0	9	0	0	0	0	0	0
5	0	0	0	0	0	17	7	10	1	60.3	0	9	0	0	0	0	0	0
2	0	0	0	0	0	16	15	1	1	48	0	0	0	0	0	0	0	0
1048	0	0	0	0	0	16	13	3	1	40.1	0	0	0	0	0	0	0	0
3	0	0	0	0	0	14	13	1	1	65.7	0	0	0	0	0	0	0	0
4	0	0	0	0	0	14	7	7	1	55.3	0	0	0	0	0	0	0	0
1254	0	0	0	0	0	13	12	1	1	60.1	0	0	0	0	0	0	0	0
74	1	0	0	0	0	40	36	4	1	30.3	0	0	1	c.937G>T	p.Asp313Tyr	0	0	3
1251	0	0	0	0	0	28	27	1	1	63.5	0	0	1	c.937G>T	p.Asp313Tyr	0	0	3
142	1	0	0	0	0	47	17	30	1	84.3	0	9	2	0	0	0	0	0
304	1	1	2	0	0	59	59	1	1	105.2	0	0	2	0	0	0	0	0
364	1	0	0	0	0	64	62	2	1	77.1	0	0	2	0	0	0	0	0
277	1	0	0	0	0	57	52	5	1	78	0	0	2	0	0	0	0	0
122	1	0	0	0	0	45	43	2	1	104.1	0	0	2	0	0	0	0	0
18	1	0	0	0	0	27	25	2	1	55	0	0	2	0	0	0	0	0
291	1	0	0	0	0	58	56	2	1	99.4	0	0	2	0	0	0	0	0
352	1	0	0	0	0	63	50	13	1	70.3	0	9	2	0	0	0	0	0
1013	1	0	0	0	0	60	56	4	1	38.8	0	0	2	0	0	9	0	0
1125	1	0	0	0	0	77	69	8	1	47.7	0	0	2	0	0	9	0	0
1017	1	0	0	0	0	60	54	6	1	41.5	0	0	2	0	0	9	0	0
1077	1	0	0	0	0	53	30	23	1	77.6	0	0	2	0	0	9	0	0
1091	1	0	0	0	0	50	47	3	1	42.6	0	0	2	0	0	9	0	0
1014	1	0	0	0	0	48	47	1	1	60.3	0	0	2	0	0	9	0	0
1006	1	0	0	0	0	43	34	9	1	69	0	0	2	0	0	9	0	0
363	1	0	0	0	0	64	49	15	1	48	0	0	2	0	0	0	0	0
356	1	0	0	0	0	63	61	2	1	84.5	0	0	2	0	0	0	0	0
333	1	0	0	0	0	61	55	6	1	40.1	0	9	2	0	0	0	0	0
224	1	0	0	0	0	54	52	2	1	41.3	0	0	2	0	0	0	0	0
1209	1	1	2	0	0	62	58	4	1	58.9	0	0	2	0	0	9	0	0
1245	1	1	2	0	0	54	49	5	1	113.8	0	0	2	0	0	9	0	0
437	1	0	0	0	0	73	71	2	1	73.6	0	9	2	0	0	0	0	0
403	1	0	0	0	0	68	36	32	1	91.2	0	9	2	0	0	0	0	0
413	1	0	0	0	0	69	67	1	1	59.3	0	0	2	0	0	0	0	0
339	1	0	0	0	0	62	58	4	1	62.1	0	9	2	0	0	0	0	0
1080	1	0	0	0	0	66	63	3	1	118	0	0	2	0	0	9	0	0
346	1	0	0	0	0	63	61	2	1	75.3	0	9	2	0	0	0	0	0
349	1	0	0	0	0	63	52	11	1	57.7	0	9	2	0	0	0	0	0
357	1	0	0	0	0	63	61	2	1	90.6	0	0	2	0	0	0	0	0
1025	1	0	0	0	0	65	60	5	1	68	0	0	2	0	0	9	0	0
1043	1	0	0	0	0	64	59	5	1	46.6	0	0	2	0	0	9	0	0
323	1	0	0	0	0	61	60	1	1	76.3	0	0	2	0	0	0	0	0
276	1	0	0	0	0	57	56	1	1	95	0	9	2	0	0	0	0	0
272	1	0	0	0	0	56	36	20	1	54.8	0	9	2	0	0	0	0	0
241	1	0	0	0	0	55	49	6	1	94	0	0	2	0	0	0	0	0
246	1	0	0	0	0	55	50	5	1	76.3	0	0	2	0	0	0	0	0
235	1	0	0	0	0	54	51	3	1	54.8	0	0	2	0	0	0	0	0
227	1	0	0	0	0	54	52	2	1	62.8	0	0	2	0	0	0	0	0
201	1	0	0	0	0	51	17	34	1	82.1	0	9	2	0	0	0	0	0
1116	1	0	0	0	0	55	49	6	1	57.4	0	0	2	0	0	9	0	0
214	1	0	0	0	0	52	51	1	1	37.4	0	0	2	0	0	0	0	0
200	1	0	0	0	0	51	47	4	1	60.6	0	0	2	0	0	0	0	0
189	1	0	0	0	0	50	40	10	1	53.1	0	0	2	0	0	0	0	0
1240	1	0	0	0	0	51	48	3	1	68.9	0	0	2	0	0	9	0	0
1055	1	0	0	0	0	50	47	3	1	42.5	0	0	2	0	0	9	0	0
1180	1	0	0	0	0	49	43	6	1	67.2	0	0	2	0	0	9	0	0
1059	1	0	0	0	0	50	46	4	1	45.5	0	0	2	0	0	9	0	0
141	1	0	0	0	0	47	41	6	1	81.3	0	9	2	0	0	0	0	0
129	1	0	0	0	0	46	45	1	1	93.4	0	9	2	0	0	0	0	0
1177	1	0	0	0	0	49	46	3	1	62.3	0	0	2	0	0	9	0	0
1272	1	0	0	0	0	48	39	9	1	72.2	0	0	2	0	0	9	0	0
1203	1	0	0	0	0	46	44	2	1	80.4	0	0	2	0	0	9	0	0
1135	1	0	0	0	0	46	43	3	1	55.5	0	0	2	0	0	9	0	0
114	1	0	0	0	0	44	24	20	1	70.7	0	0	2	0	0	0	0	0
1008	1	0	0	0	0	46	45	1	1	57.4	0	0	2	0	0	9	0	0
83	1	0	0	0	0	41	39	1	1	999	0	9	2	0	0	0	0	0
88	1	0	0	0	0	42	40	2	1	46.2	0	0	2	0	0	0	0	0
1195	1	0	0	0	0	43	33	10	1	74.8	0	0	2	0	0	9	0	0
81	1	0	0	0	0	41	40	1	1	77.6	0	0	2	0	0	0	0	0
65	1	0	0	0	0	39	38	1	1	75.4	0	9	2	0	0	0	0	0
43	1	0	0	0	0	35	34	1	1	54.2	0	9	2	0	0	0	0	0
1042	1	0	0	0	0	38	38	1	1	51.3	0	0	2	0	0	9	0	0
29	1	0	0	0	0	29	29	1	1	56	0	9	2	0	0	0	0	0
32	1	0	0	0	0	30	29	1	1	72.8	0	0	2	0	0	0	0	0
28	1	0	0	0	0	29	25	4	1	40.5	0	0	2	0	0	0	0	0
21	1	0	0	0	0	27	27	1	1	66.7	0	9	2	0	0	0	0	0
1114	1	0	0	0	0	27	17	10	1	60.9	0	0	2	0	0	9	0	0
1098	1	0	0	0	0	19	12	7	1	68.4	0	0	2	0	0	9	0	0
1	1	0	0	0	0	16	5	9	1	31.5	0	0	2	0	0	9	0	0
